# Supplementary material for: Serious Gaming for Behaviour Change: A Systematic Review
Source: MDPI journal article supplement (doi:10.3390/info13030142), 2022-03-08
Supplement: s1 [file s1]

Archive with 1 entries (1 files):
- information-1491589-supplementary.pdf
