# Supplementary material for: Serious Gaming for Behaviour Change: A Systematic Review
Source: MDPI journal article supplement (doi:10.3390/info13030142), 2022-03-08
Supplement: s1 [file s1 › information-1491589-supplementary.pdf]

|   | Name                                                                                                                                             | Game Element                                              | Behaviour change Theory                                                                                                                                                 | Discipline | Year |
|---|--------------------------------------------------------------------------------------------------------------------------------------------------|-----------------------------------------------------------|-------------------------------------------------------------------------------------------------------------------------------------------------------------------------|------------|------|
| 1 | Designing productively negative experiences with serious game mechanics: Qualitative analysis of game-play and game design in a randomized trial | Game genre<br>Adventure narrative                         | Activity Theory Model of Serious Games                                                                                                                                  | Education  | 2018 |
| 2 | Evolutionary game theory based evaluation system of green building scheme design                                                                 | evolutionary game strategy choices                        | The evolutionary game theory                                                                                                                                            | Urban      | 2018 |
| 3 | The good behaviour game: Maintenance effects                                                                                                     | Competition<br>Prizes, awards                             | Good Behaviour Game (GBG)                                                                                                                                               | Education  | 2016 |
| 4 | The Design and Game Mechanic of Combined Game Application Prototype for Learning Social Business                                                 | Winner strategy game<br>Setting objectives scenario       | N/A                                                                                                                                                                     | Education  | 2018 |
| 5 | A human-like game theory-based controller for automatic lane changing                                                                            | decision making<br>Scenario exposition<br>Time constraint | game theory-based                                                                                                                                                       | Education  | 2018 |
| 6 | Gamification design to foster stakeholder engagement and behaviour change: An application to urban freight transport                             | Participation<br>Rewarding<br>Competition                 | random utility theory (RUT)                                                                                                                                             | Urban      | 2018 |
| 7 | Understanding pivotal experiences in behaviour change for the design of technologies for personal wellbeing                                      | Competition<br>Challenge                                  | Self-Determination Theory                                                                                                                                               | Health     | 2018 |
| 8 | Sex differences in the effects of acute stress on behaviour in the ultimatum game                                                                | Scenario exposition                                       | N/A                                                                                                                                                                     | Psychology | 2018 |
| 9 | Bridging behaviour science and gaming theory: Using the Intervention Mapping Protocol to design a serious game against cyberbullying             | game Genre<br>Avatars                                     | The Intervention Mapping Protocol (IMP)<br>Transportation Theory,<br>Extended Elaboration Likelihood Model<br>(Social Cognitive Theory)<br>(Flow theory, Identification | Psychology | 2016 |

| Name |                                                                                                                           | Game Element                                                                                                                | Behaviour change Theory                                                          | Discipline   | Year |
|------|---------------------------------------------------------------------------------------------------------------------------|-----------------------------------------------------------------------------------------------------------------------------|----------------------------------------------------------------------------------|--------------|------|
| 10   | Understanding game sessions through provenance                                                                            | Quests<br>Rewards<br>Challenges<br>Avatars<br>Winning/failure states                                                        | N/A                                                                              | Entertaining | 2018 |
| 11   | Children's emotions and quality of products in participatory game design                                                  | Collaboration<br>Levels<br>Feedback                                                                                         | Self-Determination Theory (SDT)<br>control-value theory                          | Psychology   | 2017 |
| 12   | BrainQuest: The use of motivational design theories to create a cognitive training game supporting hot executive function | Avatars<br>Game Genre<br>Rules<br>Rewards<br>Leaderboard<br>Points<br>Time constraints                                      | Cognitive Evaluation Theory<br>Self-Determination Theory'<br>motivational theory | Psychology   | 2018 |
| 13   | Preliminary results for an economic exchange game designed to measure of an aspect of antisocial behaviour                | Challenges<br>Competition<br>Offer Choice                                                                                   | N/A                                                                              | Psychology   | 2016 |
| 14   | Investigating the impact of a health game on implicit attitudes towards food and food choice behaviour of young adults    | Avatar<br>Challenges<br>Feedback<br>Resource acquisition<br>Quests<br>Leaderboard<br>Virtual Goods<br>Levels<br>Clear goals | incentive-sensitization theory<br>A social cognitive theory                      | Health       | 2018 |
| 15   | Serious Game Approach to Water Distribution System Design and Rehabilitation Problems                                     | Role Playing<br>Interactivity<br>Scenario Exposition<br>Competitive                                                         | N/A                                                                              | Health       | 2017 |

|    | Name                                                                                                                 | Game Element                                                            | Behaviour change Theory                                         | Discipline | Year |
|----|----------------------------------------------------------------------------------------------------------------------|-------------------------------------------------------------------------|-----------------------------------------------------------------|------------|------|
|    |                                                                                                                      | Points/scores                                                           |                                                                 |            |      |
| 16 | Exploring the use of arcade game elements for attitude change: Two studies in the aviation safety domain             | Time constraint<br>Challenges<br>Levels<br>Avatars                      | Protection Motivation Theory                                    | Psychology | 2018 |
| 17 | Design of an mHealth App for the Self-management of Adolescent Type 1 Diabetes: A Pilot Study                        | Points<br>rewards                                                       | behaviour change theory                                         | Health     | 2012 |
| 18 | Turning the Classic Snake Mobile Game into a Location-Based Exergame that Encourages Walking                         | Points<br>Levels<br>Challenge                                           | N/A                                                             | Health     | 2012 |
| 19 | Assessing Knowledge Retention of an Immersive Serious Game vs. a Traditional Education Method in Aviation Safety     | Augmented/Virtual Reality<br>Realism<br>Scenario Exposition             | N/A                                                             | Education  | 2015 |
| 20 | Designing Serious Games for Safety Education: “Learn to Brace” versus Traditional Pictorials for Aircraft Passengers | Avatars<br>Augmented/Virtual Reality<br>Realism<br>Scenario Exposition  | Protection Motivation Theory<br>The theory of planned behaviour | Education  | 2016 |
| 21 | Flowers or a Robot Army? Encouraging Awareness & Activity with Personal, Mobile Displays                             | Rewards<br>Clear goals                                                  | self-monitoring behaviour                                       | Health     | 2018 |
| 22 | Serious games for health: An empirical study of the game “Balance” for teenagers with diabetes mellitus              | Game genre<br>Challenge<br>Levels<br>Control<br>Avatar<br>Score/ points | Social learning theory                                          | Health     | 2011 |
| 23 | Leveraging Gamification in Demand Dispatch Systems                                                                   | Points<br>Leaderboards                                                  | motivation theory<br>self-determination theory                  | Management | 2012 |

|    | Name                                                                                                                                  | Game Element                                              | Behaviour change Theory                                                                          | Discipline     | Year |
|----|---------------------------------------------------------------------------------------------------------------------------------------|-----------------------------------------------------------|--------------------------------------------------------------------------------------------------|----------------|------|
| 24 | Do badges increase user activity? A field experiment on the effects of gamification                                                   | Badges                                                    | flow theory<br>the theory of planned behavior<br>Social proof theory<br>social comparison theory | Psychology     | 2017 |
| 25 | Fish'n'Steps: Encouraging Physical Activity with an Interactive Computer Game                                                         | Rewards<br>leaderboard                                    | N/A                                                                                              | Health         | 2006 |
| 26 | Gamifying intelligent environments                                                                                                    | Points<br>Feedback<br>Leaderboard                         | N/A                                                                                              | Climate Change | 2011 |
| 27 | Using Crowdsourcing to Support Pro-Environmental Community Activism                                                                   | Points<br>Rewards<br>Badges<br>Augmented/ Virtual reality | N/A                                                                                              | Psychology     | 2013 |
| 28 | Evaluating success for behavioural change in diabetes via mhealth and gamification: mysugr's keys to retention and patient engagement | Points<br>Challenge<br>Rewards                            | N/A                                                                                              | Health         | 2013 |
| 29 | Development and Testing of a Multidimensional iPhone Pain Assessment Application for Adolescents with Cancer                          | Badges<br>Rewards                                         | N/A                                                                                              | Health         | 2013 |
| 30 | Real-World Persuasion From Virtual-World Campaigns: How Transportation Into Virtual Worlds Moderates In-Game Influence                | Avatars<br>Challenge<br>Game Genre<br>Clear Goals         | N/A                                                                                              | Transportation | 2016 |
| 31 | Adaptation of graphics and gameplay in fitness games by exploiting motion and physiological sensors                                   | Score/points<br>Challenges<br>Control                     | N/A                                                                                              | Health         | 2007 |
| 32 | Making Cool Choices for sustainability: Testing the effectiveness of a game-based approach to promoting pro-environmental behaviors   | Competition<br>Rewards<br>Offer Choice<br>Communication   | Self-perception theory                                                                           | Psychology     | 2017 |

|    | Name                                                                                                                            | Game Element                                                               | Behaviour change Theory                                                       | Discipline     | Year |
|----|---------------------------------------------------------------------------------------------------------------------------------|----------------------------------------------------------------------------|-------------------------------------------------------------------------------|----------------|------|
| 33 | Specifying and testing the design rationale of social robots for behavior change in children                                    | Collaboration<br>Challenges<br>Winning/failure status                      | Self-determination theory<br>gaming theory                                    | Health         | 2017 |
| 34 | Is experience in multi-genre video game playing accompanied by impulsivity?                                                     | role playing<br>Time constraints                                           | N/A                                                                           | Health         | 2018 |
| 35 | GAME-SCORE: Game-based energy-aware cloud scheduler and simulator for computational clouds                                      | Realism<br>Scores/points<br>Elicit Action/Decision                         | N/A                                                                           | Energy         | 2018 |
| 36 | Gender difference of social behavior in the cooperative- competitive game                                                       | Competition<br>Collaboration<br>Rules<br>Communication<br>Avatars<br>Teams | Social Exchange Theory                                                        | Psychology     | 2012 |
| 37 | iLift: A health behavior change support system for lifting and transfer techniques to prevent lower-back injuries in healthcare | Challenge<br>Rules<br>Competition<br>Rewards<br>Feedback                   | N/A                                                                           | Health         | 2016 |
| 38 | Effectiveness research on the multi-player evolutionary game of coal-mine safety regulation in China based on system dynamics   | Offer choice<br>Feedback                                                   | evolutionary game theory                                                      | Safety         | 2019 |
| 39 | Integrating behavioural change and gamified incentive modelling for stimulating water saving                                    | Feedback<br>Control<br>Points/scores<br>Badges<br>Leadboard                | Motivation theory<br>Theory of Planned Behaviour<br>Self-determination theory | Energy         | 2018 |
| 40 | Modeling lane-changing behavior in a connected environment: A game theory approach                                              | Realism<br>Control<br>Offer Choice<br>Elicit Action/Decision               | Game Theory                                                                   | Transportation | 2015 |

|    | Name                                                                                                                                                                            | Game Element                                                                    | Behaviour change Theory                                                                    | Discipline     | Year |
|----|---------------------------------------------------------------------------------------------------------------------------------------------------------------------------------|---------------------------------------------------------------------------------|--------------------------------------------------------------------------------------------|----------------|------|
| 41 | A game theoretic approach for assessing residential energy-efficiency program considering rebound, consumer behavior, and government policies                                   | Elicit Action/Decision<br>Scenario exposition                                   | Game Theory                                                                                | Energy         | 2019 |
| 42 | A decision approach with multiple interactive qualitative objectives for product conceptual schemes based on non-cooperative-cooperative game theory                            | Elicit Action/Decision<br>Collaboration                                         | Game Theory                                                                                | Engineering    | 2018 |
| 43 | Driving is not a game: Video game experience is associated with risk-taking behaviours in the driving simulator                                                                 | Scenario exposition<br>Elicit Action/Decision<br>Control                        | N/A                                                                                        | Simulation     | 2017 |
| 44 | Gamification in transport interventions: Another way to improve travel behavioural change                                                                                       | Collaboration<br>Social<br>Rewards                                              | Motivation theory<br>Utility theory                                                        | Transportation | 2018 |
| 45 | Body in the interactive game: How interface embodiment affects physical activity and health behavior change                                                                     | Augmented/Virtual Reality<br>Levels<br>Feedback<br>Avatars                      | social cognitive theory<br>flow theory                                                     | Health         | 2014 |
| 46 | The efficacy of the Friendly Attac serious digital game to promote prosocial bystander behavior in cyberbullying among young adolescents: A cluster-randomized controlled trial | Avatars<br>Winning/Failure states<br>Feedback<br>Scenario exposition<br>Realism | Social Cognitive Theory<br>Bystander Intervention<br>Model<br>Self Determination<br>Theory | Psychology     | 2018 |
| 47 | The influence of competitive and cooperative video games on behavior during play and friendship quality in adolescence                                                          | Control<br>Rewards<br>Point/scores<br>Quest<br>Levels<br>Competition            | the theory of Bounded<br>Generalized Reciprocity                                           | Psychology     | 2019 |
| 48 | Using gameplay data to examine learning behavior patterns in a serious game                                                                                                     | Scenario exposition<br>Challenge<br>Quest<br>Resource acquisition               | Game Theory                                                                                | Education      | 2017 |

|    | Name                                                                                                                                                                                     | Game Element                                                                                      | Behaviour change Theory      | Discipline     | Year |
|----|------------------------------------------------------------------------------------------------------------------------------------------------------------------------------------------|---------------------------------------------------------------------------------------------------|------------------------------|----------------|------|
| 49 | The Celsius Game: An experiential activity on management education simulating the complex challenges for the two-degree climate change target                                            | Offer choice<br>Competition<br>Collaboration<br>Elicit action/discussion<br>Resources acquisition | experiential learning theory | Education      | 2017 |
| 50 | Turkish validation of the Game Transfer Phenomena Scale (GTPS): Measuring altered perceptions, automatic mental processes and actions and behaviours associated with playing video games | Realism<br>Avatars<br>Interactions                                                                | N/A                          | Psychology     | 2017 |
| 51 | Muscle activation behavior in a swimming exergame: Differences by experience and gaming velocity                                                                                         | Feedback<br>Competitiveness<br>Levels                                                             | N/A                          | Health         | 2017 |
| 52 | Modeling Lane-Changing Behavior in a Connected Environment: A Game Theory Approach                                                                                                       | Elicit Action/discussion<br>Control<br>Interaction                                                | Game theory                  | Transportation | 2015 |
| 53 | Gaming for the energy transition. Experimenting and learning in co-designing a serious game prototype                                                                                    | Virtual Goods<br>Gifting<br>Realism<br>Challenge                                                  | N/A                          | Education      | 2017 |
| 54 | Does a prosocial decision in video games lead to increased prosocial real-life behavior? The impact of reward and reasoning                                                              | Challenge<br>Leaderboard<br>Control<br>Avatars<br>Game Genre<br>Elicit action/decision            | Moral Foundation Theory      | Psychology     | 2018 |
| 55 | Gaming climate change: assessing online climate change games targeting youth produced in Spanish                                                                                         | Rules<br>Feedback<br>Rewards<br>Elicit Action/decision                                            | N/A                          | Education      | 2017 |

|    | Name                                                                                                                         | Game Element                                                          | Behaviour change Theory                                | Discipline          | Year |
|----|------------------------------------------------------------------------------------------------------------------------------|-----------------------------------------------------------------------|--------------------------------------------------------|---------------------|------|
| 56 | Does it last? Long-term impacts of an app-based behavior change intervention on household electricity savings in Switzerland | Competitive<br>Collaborative<br>challenging<br>Interaction            | Theory of Planned Behavior<br>Social Practice Theory   | Energy              | 2019 |
| 57 | The role of executive control in young children's serious gaming behavior                                                    | Scenario Exposition<br>Quests<br>Scaffolds<br>Control                 | empirical theory                                       | Psychology          | 2015 |
| 58 | Effects of cooperative gaming and avatar customization on subsequent spontaneous helping behavior                            | Collaboration<br>Competition<br>Avatar<br>Offer Choice                | N/A                                                    | Psychology          | 2014 |
| 59 | Hot under the collar: The impact of heat on game play                                                                        | Rewards<br>Control<br>Offer choice                                    | N/A                                                    | Psychology          | 2017 |
| 60 | Putting yourself in someone else's shoes: The impact of a location-based, collaborative role-playing game on behaviour       | Role playing<br>Elicit Action/decision<br>Scenario exposition         | Theory of Planned Behaviour<br>social cognitive theory | Health              | 2015 |
| 61 | Online behavior change detection in computer games                                                                           | Boss fights<br>Challenges<br>Scenario Exposition<br>Collections       | N/A                                                    | Psychology          | 2013 |
| 62 | Taking control! Structural and behavioural plasticity in response to game-based inhibition training in older adults          | Time constraint<br>Collections<br>Feedback<br>Rewards<br>Point/Scores | N/A                                                    | Health              | 2017 |
| 63 | Extending the theory of planned behavior (TPB) to explain online game playing among Malaysian undergraduate students         | Collections<br>Gifts<br>Collaboration<br>Challenge                    | Theory of planned behavior                             | Information Systems | 2017 |

|    | Name                                                                                                                                               | Game Element                                                                           | Behaviour change Theory | Discipline    | Year |
|----|----------------------------------------------------------------------------------------------------------------------------------------------------|----------------------------------------------------------------------------------------|-------------------------|---------------|------|
|    |                                                                                                                                                    | Avatars<br>Resources acquisition                                                       |                         |               |      |
| 64 | With great power comes great responsibility: Superhero primes and expansive poses influence prosocial behavior after a motion-controlled game task | Control<br>Immersion<br>Realism<br>Augmented/Virtual Reality<br>Boss Fights            | self-perception theory  | Psychology    | 2017 |
| 65 | Going out of business: Auction house behavior in the Massively Multi-player Online Game Glitch                                                     | Avatars<br>Collection<br>Role playing<br>Leaderboard<br>Scores/points                  | N/A                     | Entertainment | 2014 |
| 66 | GameFoundry: Social Gaming Platform for Digital Marketing, User Profiling and Collective Behavior                                                  | Rewards<br>Social<br>Badges<br>Leaderboard<br>Levels                                   | N/A                     | Psychology    | 2014 |
| 67 | Personality and behavior in a massively multiplayer online role-playing game                                                                       | Collections<br>Gifts<br>Collaboration<br>Challenge<br>Avatars<br>Resources acquisition | N/A                     | Entertainment | 2014 |
| 68 | Reducing disruptive behavior in an urban school cafeteria: An extension of the Good Behavior Game                                                  | Teams<br>Point/scores<br>Feedback<br>Rewards                                           | N/A                     | Psychology    | 2009 |
| 69 | Involving people in the building up of smart and sustainable cities: How to influence commuters' behaviors through a mobile app game               | Leaderboard<br>Rewards<br>Points/scores<br>Challenge                                   | N/A                     | Urban         | 2018 |

|    | Name                                                                                                                                                                                                      | Game Element                                                               | Behaviour change Theory | Discipline | Year |
|----|-----------------------------------------------------------------------------------------------------------------------------------------------------------------------------------------------------------|----------------------------------------------------------------------------|-------------------------|------------|------|
| 70 | Community Game Day: Using an End-of-Life Conversation Game to Encourage Advance Care Planning                                                                                                             | Rules<br>Social                                                            | N/A                     | Health     | 2017 |
| 71 | An inclusive design approach for developing video games for children with Autism Spectrum Disorder                                                                                                        | Interactions<br>Avatars<br>Scaffolds<br>Challenge<br>Immersion             | N/A                     | Health     | 2017 |
| 72 | Involving people in the building up of smart and sustainable cities: How to influence commuters' behaviors through a mobile app game                                                                      | Rewards<br>Points/Scores<br>Challenge<br>Achievements                      | N/A                     | Cities     | 2018 |
| 73 | The effects of a bike active video game on players' physical activity and motivation                                                                                                                      | Time constraints<br>Levels<br>Scores/Points<br>Feedback<br>Challenge       | N/A                     | Health     | 2017 |
| 74 | Evaluating the impact of a cloud-based serious game on obese people                                                                                                                                       | Rewards<br>Clear goal<br>Levels<br>Leaderboards<br>Avatars<br>Interactions | N/A                     | Health     | 2014 |
| 75 | The role of children's on-task behavior in the prevention of aggressive behavior development and peer rejection: A randomized controlled study of the Good Behavior Game in Belgian elementary classrooms | Rewards<br>Teams<br>Winning/Failure states                                 | N/A                     | Psychology | 2013 |
| 76 | Mobile game design for the elderly: A study with focus on the motivation to play                                                                                                                          | Game genre<br>Elicit Direction/ Decision<br>Scores/Points                  | Flow theory             | Psychology | 2015 |

|    | Name                                                                                                                           | Game Element                                                                                                      | Behaviour change Theory                          | Discipline    | Year |
|----|--------------------------------------------------------------------------------------------------------------------------------|-------------------------------------------------------------------------------------------------------------------|--------------------------------------------------|---------------|------|
|    |                                                                                                                                | Quests                                                                                                            |                                                  |               |      |
| 77 | Exploring the influence of common game elements on ideation output and motivation                                              | Rewards<br>Scores/Points<br>Competition<br>feedback                                                               | gamification theory<br>self-determination theory | Business      | 2018 |
| 78 | Phonological Disorders in Children? Design and user experience evaluation of a mobile serious game approach                    | Levels<br>Elicit action/ decision<br>Points/ Scores<br>Resource Acquisition<br>Virtual Goods<br>Content Unlocking | N/A                                              | Health        | 2017 |
| 79 | Them and Us: An indoor pervasive gaming experience                                                                             | Interactions<br>Points/ Scores<br>Collaboration                                                                   | game play theory                                 | Entertainment | 2013 |
| 80 | Driven to drive? Investigating the effect of gamification on learner driver behavior, perceived motivation and user experience | Clear goal<br>Feedback<br>Rewards<br>Rules<br>Challenges<br>Elicit Action/ decision strategies                    | Flow theory                                      | Education     | 2017 |
| 81 | Changing children's eating behaviour - A review of experimental research                                                       | Rewards<br>Challenge<br>Offer choice                                                                              | N/A                                              | Health        | 2017 |
| 82 | Policy Gaming for Strategy and Change                                                                                          | Teams<br>Challenge<br>Role playing<br>Augmented/virtual Reality                                                   | N/A                                              | Planning      | 2007 |

|    | Name                                                                                | Game Element                                                                           | Behaviour change Theory                                                            | Discipline    | Year |
|----|-------------------------------------------------------------------------------------|----------------------------------------------------------------------------------------|------------------------------------------------------------------------------------|---------------|------|
| 83 | How feedback boosts motivation and play in a brain-training game                    | Feedback<br>Avatars                                                                    | Self Determination Theory<br>Cognitive Evaluation Theory (CET)                     | Education     | 2015 |
| 84 | An alternate reality game for facility resilience (ARGFR)                           | Augmented/Virtual Reality<br>Feedback<br>Time constraints                              | N/A                                                                                | Engineering   | 2015 |
| 85 | Design challenges in motivating change for sustainable urban mobility               | Feedback<br>Challenge                                                                  | N/A                                                                                | Urban         | 2014 |
| 86 | Nudging and shoving: Using in-game cues to guide player exertion in exergames       | Immersion<br>Feedback<br>Winning/losing states<br>Game genre<br>Avatar<br>Score/Points | The theory of immersion motivation-hygiene theory                                  | Health        | 2017 |
| 87 | Dispelling the myth of the socio-emotionally dissatisfied gamer                     | Competence<br>Immersion<br>Social                                                      | Self-Determination Theory (SDT)                                                    | Psychology    | 2014 |
| 88 | Cognitive enhancement in video game players: The role of video game genre           | Game genre<br>role-playing strategy                                                    | Signal detection theory                                                            | Entertainment | 2015 |
| 89 | Design and Evaluation of a Computer Game to Promote a Healthy Diet for Young Adults | Role-playing<br>Avatars<br>Leaderboards<br>Communication<br>Points/scores              | social cognitive theory<br>theory of reasoned action<br>theory of planned behavior | Health        | 2009 |
| 90 | Positive impact by design: The Wales Centre for Behaviour Change                    | Game genre<br>Levels<br>Feedback<br>Challenges<br>Immersion                            | flow theory<br>dual-process theory                                                 | Psychology    | 2014 |

|    | Name                                                                                                                       | Game Element                                                              | Behaviour change Theory         | Discipline          | Year |
|----|----------------------------------------------------------------------------------------------------------------------------|---------------------------------------------------------------------------|---------------------------------|---------------------|------|
| 91 | Performance meets games: considering interaction strategies in game design                                                 | role-playing<br>competition<br>Winning/lose states                        | N/A                             | Media               | 2013 |
| 92 | The rationalization process of online game cheating behaviors                                                              | Social<br>Feedback                                                        | the active audience theory      | Psychology          | 2018 |
| 93 | Gamification for Behavior Change: Lessons from Developing a Social, Multiuser, Web-Tablet Based Prevention Game for Youths | Rewards<br>Control<br>Challenges<br>Clear Goal<br>Points/ Scores<br>Teams | Theory of Planned Behavior      | Psychology          | 2013 |
| 94 | Differential Effectiveness of Interdependent and Dependent Group Contingencies in Reducing Disruptive Classroom Behavior   | Rules<br>Teams<br>Winning/lose states<br>Rewards                          | N/A                             | Psychology          | 2016 |
| 95 | Enhancing User-Game Engagement Through Software Gaming Elements                                                            | Avatars<br>Control<br>Levels<br>Competence                                | Self-determination theory       | Information Systems | 2014 |
| 96 | Gaming personality and game dynamics in online discussion instructions                                                     | Rewards<br>Leaderboards<br>Challenge                                      | self-determination theory (SDT) | Education           | 2015 |
| 97 | The good behaviour game                                                                                                    | Winning/losing states<br>Teams                                            | N/A                             | Psychology          | 2000 |
| 98 | Understanding problem solving behavior of 6–8 graders in a debugging game                                                  | Challenge<br>Control<br>Rewards                                           | N/A                             | Education           | 2017 |
| 99 | Visual behavior and self-efficacy of game playing: an eye movement analysis                                                | Avatars<br>Leaderboards                                                   | N/A                             | Education           | 2018 |

|     | Name                                                                                                                          | Game Element                                                                                 | Behaviour change Theory                    | Discipline  | Year |
|-----|-------------------------------------------------------------------------------------------------------------------------------|----------------------------------------------------------------------------------------------|--------------------------------------------|-------------|------|
| 100 | Role of user-created programs in online game consumer behavior                                                                | role-playing<br>immersion<br>Collaboration                                                   | Achievement goal theory                    | Marketing   | 2016 |
| 101 | Design evaluation of digital consumer products using virtual reality-based functional behaviour simulation                    | immersion<br>Augmented/Virtual Reality                                                       | N/A                                        | Engineering | 2008 |
| 102 | The Role Behavioral of Activation and Inhibition in Explaining Adolescents' Game Use and Game Engagement Levels               | Competition<br>Rewarding<br>Game genre                                                       | the reinforcement sensitivity theory (RST) | Psychology  | 2017 |
| 103 | Challenges of designing for sociability to enhance player experience in Massively Multi-player Online Role-playing Games      | Rewards<br>Communication<br>Social<br>Role Playing                                           | N/A                                        | Psychology  | 2013 |
| 104 | Contributions of Game Genre and Masculinity Ideologies to Associations Between Video Game Play and Men's Risk-Taking Behavior | game genre<br>Control                                                                        | N/A                                        | Psychology  | 2018 |
| 105 | What Is Good Can Also Be Bad: The Prosocial and Antisocial In-Game Behaviors of Young Video Game Players                      | Game genre<br>Teams<br>Collaboration<br>Communication                                        | social-cognitive theories                  | Psychology  | 2013 |
| 106 | Gamification for Behavior Change: Lessons from Developing a Social, Multiuser, Web-Tablet Based Prevention Game for Youths    | Offer choice<br>Teams<br>Challenge<br>Points/Scores<br>Elicit Action/Decision<br>competition | the Theory of Planned Behavior             | Psychology  | 2013 |
| 107 | Gaming personality and game dynamics in online discussion instructions                                                        | Rewards<br>Feedback<br>Badges<br>Levels<br>Points/Scores                                     | self-determination theory (SDT)            | Education   | 2015 |

| Name |                                                                                                                                          | Game Element                                                             | Behaviour change Theory | Discipline    | Year |
|------|------------------------------------------------------------------------------------------------------------------------------------------|--------------------------------------------------------------------------|-------------------------|---------------|------|
| 108  | Maximising Gain for Minimal Pain: Utilising Natural Game Mechanics                                                                       | Feedback<br>Scores/Points<br>Competition<br>Challenge<br>Levels<br>Quest | N/A                     | Education     | 2013 |
| 109  | Coping with [R]evolution in Online Games: Vulnerability and Resilience Responses to Change in MMO Game Expansions                        | Avatar<br>Communication<br>Quests                                        | N/A                     | Entertainment | 2018 |
| 110  | Gamestar Mechanic: learning a designer mindset through communicational competence with the language of games                             | Role-playing<br>Avatar<br>Clear Goal<br>Scaffold<br>Feedback<br>Rewards  | N/A                     | Education     | 2010 |
| 111  | The game mechanics of pervasive applications: visiting the uncanny                                                                       | Game Genre<br>Scores/Points<br>Resources acquisition                     | N/A                     | Entertainment | 2012 |
| 112  | Uncanny Gaming<br>The Ravenhearst video games and gothic appropriation                                                                   | Game Genres<br>Challenges<br>Elicit action/decision                      | N/A                     | Media         | 2015 |
| 113  | Using game mechanics for field evaluation of prototype social applications: a novel methodology                                          | Challenges<br>Feedback<br>Clear Goals<br>Social                          | N/A                     | Psychology    | 2016 |
| 114  | Developing a Brief Sensation Seeking Scale for Children: Establishing Concurrent Validity With Video Game Use and Rule-Breaking Behavior | Strategy<br>role playing<br>game genres<br>Rules<br>Rewards              | N/A                     | Psychology    | 2011 |

|     | Name                                                                                                                                                   | Game Element                                                                               | Behaviour change Theory                 | Discipline | Year |
|-----|--------------------------------------------------------------------------------------------------------------------------------------------------------|--------------------------------------------------------------------------------------------|-----------------------------------------|------------|------|
| 115 | Does educational gamification improve students' motivation? If so, which game elements work best?                                                      | Points/Scores<br>Leaderboards<br>Unlocking content<br>Gifting                              | Self-determination theory               | Education  | 2018 |
| 116 | The queer case of video games: orgasms, Heteronormativity, and video game narrative                                                                    | Quests<br>role-playing                                                                     | narrative theory                        | Psychology | 2016 |
| 117 | Playing with Process: Video Game Choice as a Model of Behavior                                                                                         | Offer Choice<br>Strategy<br>Challenge<br>Role playing<br>Elicit Action/Decision<br>Rewards | N/A                                     | Psychology | 2010 |
| 118 | Can serious games help to mitigate climate change? Exploring their influence on Spanish and American teenagers' attitudes                              | Elicit Action/decision<br>Immersion<br>Challenges<br>feedback                              | A theory of planned behavior            | Psychology | 2018 |
| 119 | Marketing, Technology, and Medicine: Recommendations on How to Incorporate Psychological Principles into New Technologies to Promote Healthy Behaviors | Competition<br>Challenge<br>Rewards<br>Levels                                              | N/A                                     | Health     | 2014 |
| 120 | Entrepreneurial Decision Making in a Dynamic Environment                                                                                               | Elicit action/ decision<br>Virtual goods<br>Feedback                                       | N/A                                     | Business   | 2006 |
| 121 | 'Gamification': Influencing health behaviours with games                                                                                               | Strategy<br>Points/scores<br>Elicit Action/decision<br>rewards                             | N/A                                     | Health     | 2013 |
| 122 | Developing Games for Health Behavior Change: Getting Started                                                                                           | role playing<br>Resource acquisition<br>Rules<br>Points/scores                             | health behavior theory<br>action theory | Health     | 2013 |

| Name |                                                                                                              | Game Element                                                                                                 | Behaviour change Theory           | Discipline          | Year |
|------|--------------------------------------------------------------------------------------------------------------|--------------------------------------------------------------------------------------------------------------|-----------------------------------|---------------------|------|
|      |                                                                                                              | competence                                                                                                   |                                   |                     |      |
| 123  | Social motivations to use gamification: an Empirical study of gamifying exercise                             | Feedback<br>Rewards<br>Achievements<br>Levels                                                                | theory of planned behaviour (TPB) | Information Systems | 2013 |
| 124  | Towards personalised, gamified systems: an investigation into game design, personality and player typologies | Challenge<br>Leader boards<br>Points<br>Quests<br>Levels<br>Reward<br>Achievements<br>Winning/failure status | self-determination theory         | Psychology          | 2013 |
| 125  | Taking The Game Out Of Gamification                                                                          | Points<br>Badges<br>Levels<br>Virtual resources<br>Rewards                                                   | N/A                               | Management          | 2013 |
| 126  | Encouraging User Behaviour with Achievements: An Empirical Study                                             | Badges<br>Rewards<br>Scores/Points<br>Achievements<br>Clear goal                                             | N/A                               | Information Systems | 2013 |
| 127  | Climate change games as tools for education and engagement                                                   | Clear goals<br>rules<br>Avatars<br>Feedback<br>Teams<br>Role Playing                                         | A self-determination theory       | Climate Change      | 2015 |

|     | Name                                                                                                                                                          | Game Element                                                                                | Behaviour change Theory           | Discipline | Year |
|-----|---------------------------------------------------------------------------------------------------------------------------------------------------------------|---------------------------------------------------------------------------------------------|-----------------------------------|------------|------|
| 128 | Intervening to change behaviour and save energy in the workplace: A systematic review of available evidence                                                   | Feedback<br>Rewards<br>Competition<br>Social                                                | Theory of Planned Behaviour (TPB) | Energy     | 2016 |
| 129 | Keeping up with the joneses: examining community-level collaborative and competitive game mechanics to enhance household electricity-saving behaviour         | Points/ Scores<br>Rewards<br>Teams<br>Challenges<br>Badges<br>Feedback                      | social proof theory               | Energy     | 2016 |
| 130 | Why do you play World of Warcraft? An in-depth exploration of self-reported motivations to play online and in-game behaviours in the virtual world of Azeroth | Challenge<br>Role play<br>Achievements<br>Rewards<br>Quests<br>Avatars                      | N/A                               | Psychology | 2013 |
| 131 | Practical, Appropriate, Empirically-Validated Guidelines for Designing Educational Games                                                                      | Feedback<br>Clear goal<br>Offer choice<br>Elicit action/decision<br>Achievements<br>Rewards | Fun theory                        | Education  | 2011 |
| 132 | The development approach of a pedagogically-driven serious game to support Relationship and Sex Education (RSE) within a classroom setting                    | Levels<br>Rewards<br>Feedback<br>Role Playing<br>Competition<br>Realism<br>Discovery        | Theory of Planned Behaviour (TPB) | Education  | 2013 |
| 133 | Level Up Your Strategy: Towards a Descriptive Framework for Meaningful Enterprise Gamification                                                                | Challenges<br>Elicit action/decision                                                        | A self-determination theory       | Technology | 2015 |

| Name |                                                                                                   | Game Element                                                                                                          | Behaviour change Theory                                 | Discipline     | Year |
|------|---------------------------------------------------------------------------------------------------|-----------------------------------------------------------------------------------------------------------------------|---------------------------------------------------------|----------------|------|
|      |                                                                                                   | Collaboration<br>Rules<br>Offer choices<br>Rewards                                                                    | Fun theory                                              |                |      |
| 134  | The Kaleidoscope of Effective Gamification: Deconstructing Gamification in Business Applications  | Challenges<br>Elicit actions/decision<br>Achievements                                                                 | Self-determination theory                               | Business       | 2013 |
| 135  | Serious fun with computer games                                                                   | Immersive<br>Challenge<br>Rules                                                                                       | Theory of Fun                                           | Entertainment  | 2010 |
| 136  | Playful Mobility Choices: Motivating informed mobility decision making by applying game mechanics | Rewards<br>Winning/failure status<br>Offer choice<br>Competence<br>Leader boards<br>Quests<br>Social<br>Collaboration | self-determination theory                               | Climate change | 2014 |
| 137  | Gamification and Education: A Literature Review                                                   | Points/Scores<br>Levels<br>Badges<br>rewards                                                                          | N/A                                                     | Education      | 2014 |
| 138  | Playing for Real Video Games and Stories for Health-Related Behavior Change                       | Immersion<br>Challenges<br>Clear goal<br>Reward<br>Elicit action/decision                                             | social cognitive theory (SCT)                           | Health         | 2008 |
| 139  | Gamifying Behaviour that Leads to Learning                                                        | Competitions<br>Rewards<br>Clear goals<br>Challenges                                                                  | Theory of Motivation<br>self-determination theory (SDT) | Education      | 2013 |

| Name |                                                                                                                                                      | Game Element                                                                    | Behaviour change Theory   | Discipline | Year |
|------|------------------------------------------------------------------------------------------------------------------------------------------------------|---------------------------------------------------------------------------------|---------------------------|------------|------|
|      |                                                                                                                                                      | Offer choices<br>Points/ Scores                                                 |                           |            |      |
| 140  | Eudaimonic Design, or: Six Invitations to Rethink Gamification                                                                                       | goals<br>rules<br>feedback<br>challenges<br>competition<br>badges               | Self-Determination Theory | Game       | 2014 |
| 141  | The potential for using gamification in academic libraries in order to increase student engagement and achievement                                   | Achievement<br>Levels<br>Interactions<br>Social<br>Points/Scores<br>badges      | N/A                       | Education  | 2014 |
| 142  | Computer games to teach hygiene: an evaluation of the e-Bug junior game                                                                              | collaborative<br>Social<br>Quests<br>Rules<br>level                             | N/A                       | Education  | 2011 |
| 143  | Gamification in business and education – project of gamified course for university students                                                          | Feedback<br>Achievements<br>Score/points<br>Badges<br>Leaderboard<br>Challenges | N/A                       | Education  | 2014 |
| 144  | Voluntary Pupil Size Change as Control in Eyes Only Interaction                                                                                      | Feedback<br>role playing                                                        | N/A                       | Health     | 2008 |
| 145  | A trace-based approach to identifying users' engagement and qualifying their engaged-behaviours in interactive systems: application to a social game | Challenges<br>Competence<br>Elicit decision/Action                              | Self-Determination Theory | Psychology | 2014 |

| Name |                                                                                                                                       | Game Element                                                                         | Behaviour change Theory             | Discipline        | Year |
|------|---------------------------------------------------------------------------------------------------------------------------------------|--------------------------------------------------------------------------------------|-------------------------------------|-------------------|------|
|      |                                                                                                                                       | Clear goals<br>rules                                                                 | Activity Theory and<br>Trace Theory |                   |      |
| 146  | Playful Mobility Choices: Motivating informed mobility decision making by applying game mechanics                                     | Feedback<br>Clear goal                                                               | N/A                                 | Climate<br>change | 2014 |
| 147  | Learning principles and interaction design for 'Green My Place': A massively multiplayer serious game                                 | Achievement<br>Feedback<br>comparative<br>Score/points                               | N/A                                 | Energy            | 2011 |
| 148  | Practical Application of the Learning Mechanics– Game Mechanics (LM-GM) framework for Serious Games Analysis in Engineering Education | Feedback<br>Competition<br>Clear goal<br>Elicit Action/decision<br>Levels<br>Rewards | N/A                                 | Education         | 2016 |
| 149  | Skill-based differences in spatio-temporal team behaviour in defence of the Ancients 2 (DotA 2)                                       | Challenging<br>Game genre<br>Competitive<br>Avatars<br>Winning/failure status        | N/A                                 | Psychology        | 2014 |
| 150  | Gameful Design in the Automotive Domain – Review, Outlook and Challenges                                                              | Challenges<br>Rewards<br>clear goal<br>Elicit action/decision<br>Feedback<br>Rules   | Fun theory                          | Automotive        | 2013 |
| 151  | Digital and social media opportunities for dietary behaviour change                                                                   | Challenges<br>Rewards<br>Achievements<br>Interactions<br>competitiveness             | Social cognitive theory             | Health            | 2015 |

|     | Name                                                                                       | Game Element                                                                            | Behaviour change Theory   | Discipline          | Year |
|-----|--------------------------------------------------------------------------------------------|-----------------------------------------------------------------------------------------|---------------------------|---------------------|------|
| 152 | Gaming to Master the game-game usability and game mechanics                                | Avatar<br>Scenario exposition                                                           | N/A                       | Entertainment       | 2014 |
| 153 | Adapting Game Mechanics with Micro-Machinations                                            | Challenges<br>Feedback<br>Collaboration<br>Rules<br>Clear Goal<br>interaction           | N/A                       | Entertainment       | 2014 |
| 154 | Games Just Wanna Have Fun...Or Do They? Measuring The Effectiveness of Persuasive Games    | Time constraints<br>Virtual Goods<br>Scores/Points                                      | N/A                       | Psychology          | 2007 |
| 155 | Gamifying information systems – a synthesis of gamification mechanics and dynamics         | Challenges<br>Rewards<br>Points/scores<br>Leader boards<br>Levels                       | Self-determination theory | Information systems | 2014 |
| 156 | Saving energy in an office environment: A serious game intervention                        | Feedback<br>Rewards<br>Virtual Goods                                                    | Self-determination theory | Energy              | 2014 |
| 157 | Towards a trans-disciplinary methodology for a game-based intervention development process | Challenges<br>Collaboration<br>Scaffolds<br>Immersion<br>Social<br>Competition<br>rules | N/A                       | Education           | 2017 |
| 158 | Towards a Video Game Description Language                                                  | Avatars<br>Rules<br>Avatars<br>Scores/Points                                            | N/A                       | Entertainment       | 2013 |

|     | Name                                                                                                                | Game Element                                                                                               | Behaviour change Theory                                       | Discipline | Year |
|-----|---------------------------------------------------------------------------------------------------------------------|------------------------------------------------------------------------------------------------------------|---------------------------------------------------------------|------------|------|
| 159 | Game Mechanics supporting pervasive learning and experience in Games, Serious Games, and Interactive & Social Media | Role Playing<br>Interaction<br>Elicit Actions/Decisions                                                    | N/A                                                           | Education  | 2015 |
| 160 | Towards evolutionary game models of financial markets                                                               | Competitive<br>Interactions<br>Elicit Actions/decisions                                                    | Evolutionary game theory                                      | Business   | 2001 |
| 161 | Students' behaviour playing an online information literacy game                                                     | Rewards<br>Feedback<br>Points/scores<br>badges<br>levels                                                   | N/A                                                           | Education  | 2001 |
| 162 | How Gamification Applies for Educational Purpose Specially with College Algebra                                     | Scaffolding<br>Competition<br>Feedback<br>Badges<br>Levels<br>Clear goal<br>Achievements<br>Scores/ Points | N/A                                                           | Education  | 2014 |
| 163 | Gamification is all about fun: the role of incentive type and community collaboration                               | Collaboration<br>Points<br>Badges<br>Leaderboards<br>Rewards<br>Levels<br>Quests<br>challenges             | Self Determination Theory (SDT)<br>Goal Contents Theory (GCT) | Psychology | 2014 |
| 164 | The Maturing of Gamification Research                                                                               | points<br>badges<br>levels<br>leaderboards                                                                 | Self-Determination Theory                                     | Psychology | 2017 |

|     | Name                                                                                                        | Game Element                                                                                  | Behaviour change Theory | Discipline    | Year |
|-----|-------------------------------------------------------------------------------------------------------------|-----------------------------------------------------------------------------------------------|-------------------------|---------------|------|
|     |                                                                                                             | Clear goal                                                                                    |                         |               |      |
| 165 | Engineering design using game-enhanced CAD: The potential to augment the user experience with game elements | Challenges<br>Immersion<br>Feedback rewards.<br>Curiosity<br>Game Genre                       | A theory of fun         | Engineering   | 2013 |
| 166 | IgnitePlay: Encouraging and Sustaining Healthy living through Social Games                                  | Challenges<br>Competition<br>'leader boards<br>Clear goals<br>levels                          | N/A                     | Entertainment | 2011 |
| 167 | A Case Study in the Gamification of a University-level Games Development Course                             | Reward<br>Feedback<br>role-playing<br>Points/Scores<br>Offer choice<br>Badges<br>Leaderboards | N/A                     | Education     | 2013 |
| 168 | LEY! Persuasive Pervasive Gaming on Domestic Energy Consumption-Awareness                                   | Scores/points<br>Levels<br>Challenge<br>feedback                                              | N/A                     | Energy        | 2011 |
| 169 | Framework for Designing and Evaluating Game Achievements                                                    | Achievements<br>Rewards<br>Challenge<br>Badges<br>Points/scores<br>Elicit Action/Decision     | N/A                     | Entertainment | 2011 |

|     | Name                                                                                                                           | Game Element                                                                                | Behaviour change Theory   | Discipline    | Year |
|-----|--------------------------------------------------------------------------------------------------------------------------------|---------------------------------------------------------------------------------------------|---------------------------|---------------|------|
| 170 | Evaluation of object-oriented design patterns in game development                                                              | Rules<br>Points                                                                             | N/A                       | Engineering   | 2007 |
| 171 | A multiplayer case based story engine                                                                                          | Avatar<br>Levels<br>Clear goal<br>Offer choice                                              | N/A                       | Entertainment | 2003 |
| 172 | Time's Up: Studying Leaderboards For Engaging Punctual Behaviour                                                               | Leaderboards<br>Scores<br>Collaboration<br>Levels<br>competence                             | Self-determination theory | Psychology    | 2013 |
| 173 | Pervasive Serious Gaming for Behavior Change – The State of Play                                                               | Feedback<br>Challenge<br>Rewards<br>Competition<br>Elicit Action/ decision                  | N/A                       | Psychology    | 2013 |
| 174 | Gamification: What It Is and Why It Matters to Digital Health Behavior Change Developers                                       | clear goals<br>feedback<br>rewards<br>badges<br>achievements                                | self-regulation theory    | Health        | 2013 |
| 175 | Strategies for Effective Digital Games Development and Implementation                                                          | Role Playing<br>Collaborations<br>Points/Scores<br>Levels<br>Feedback<br>Realism<br>Rewards | Game theory               | Learning      | 2013 |
| 176 | Prosocial behaviour in avatar-mediated interaction: the influence of character gender on material versus emotional help-giving | Interaction<br>Avatar<br>virtual goods                                                      | N/A                       | Psychology    | 2011 |

| Name |                                                                                                                           | Game Element                                                | Behaviour change Theory         | Discipline    | Year |
|------|---------------------------------------------------------------------------------------------------------------------------|-------------------------------------------------------------|---------------------------------|---------------|------|
| 177  | Narrative Game Mechanics                                                                                                  | Interaction<br>Rules<br>Immersive<br>Offer Choices<br>level | N/A                             | Entertainment | 2016 |
| 178  | Open Data, Crowdsourcing and Game Mechanics. A case study on civic participation in the digital age                       | Competence<br>Leaderboard<br>feedback                       | Self-Determination Theory (SDT) | Journalism    | 2016 |
| 179  | I Mean It! Detecting User Intentions to create Believable Behaviour for Virtual Agents in Games                           | Avatar<br>role-playing<br>interaction                       | N/A                             | Psychology    | 2010 |
| 180  | Knowledge Management using Gamification                                                                                   | Rewards<br>Challenges<br>leader board<br>points<br>badges   | N/A                             | Education     | 2016 |
| 181  | Gamification and Human Resources: an overview                                                                             | Challenges<br>Quests<br>Feedback<br>Points<br>rewards       | N/A                             | Business      | 2015 |
| 182  | Exploring Gamification Techniques and Applications for Sustainable Tourism                                                | Social<br>Feedback<br>Competition<br>Levels<br>Badges       | N/A                             | Tourism       | 2015 |
| 183  | Gamified physical activation of young men – a Multidisciplinary Population-Based Randomized Controlled Trial (MOPO study) | Rewards<br>Feedback<br>Avatar<br>achievements               | N/A                             | Health        | 2013 |

|     | Name                                                                                         | Game Element                                                                                         | Behaviour change Theory                        | Discipline          | Year |
|-----|----------------------------------------------------------------------------------------------|------------------------------------------------------------------------------------------------------|------------------------------------------------|---------------------|------|
| 184 | Gamification: using gaming mechanics to promote a business                                   | Levels<br>Challenge<br>Immersive<br>Achievement points                                               | N/A                                            | Business            | 2014 |
| 185 | The Effects of Embodied Persuasive Games on Player Attitudes Toward People Using Wheelchairs | Challenges<br>Interaction<br>Time constraint                                                         | Self-Perception Theory                         | Health              | 2014 |
| 186 | Game, Not Fight: Change Climate Change!                                                      | Interaction<br>Role-play<br>Rules<br>feedback                                                        | Theory of Gaming                               | climate change      | 2013 |
| 187 | Gamification: a systematic review of design frameworks                                       | Competition<br>Levels<br>Points<br>Challenges<br>Rules<br>time Constraints<br>communication<br>Teams | Game Theory<br>Self Determination Theory (SDT) | Education           | 2017 |
| 188 | Gamification patterns for gamification applications                                          | Competition<br>Rules<br>Points<br>Collaborations<br>Badge                                            | N/A                                            | Information systems | 2014 |
| 189 | A Haptic-Based Virtual Reality Head and Neck Model for Dental Education                      | Virtual Reality<br>Interactive<br>Feedback<br>Immersive<br>challenging                               | N/A                                            | Health              | 2014 |

|     | Name                                                                                                 | Game Element                                                                                     | Behaviour change Theory                                                                            | Discipline | Year |
|-----|------------------------------------------------------------------------------------------------------|--------------------------------------------------------------------------------------------------|----------------------------------------------------------------------------------------------------|------------|------|
| 190 | Serious games as new educational tools: how effective are they? A meta-analysis of recent studies    | Virtual Immersion Challenge                                                                      | the Flow Theory                                                                                    | health     | 2013 |
| 191 | The Changing Dynamic of Social Interaction in World of Warcraft: The Impacts of Game Feature Change. | badge<br>rewards<br>competition<br>Collaboration<br>Avatar<br>Role play                          | N/A                                                                                                | Psychology | 2008 |
| 192 | Enhancing workplace motivation through gamification: Transferrable lessons from pedagogy             | Achievement<br>Challenge<br>Competence<br>leader-boards<br>badges<br>points<br>avatars<br>Quests | cognitive evaluation theory<br>Self-Determination Theory (SDT)<br>Four-Drives theory of motivation | Education  | 2016 |
| 193 | An inquiry into gamification services: Practices, experiences and insights                           | Competition<br>Points<br>Levels<br>Leaderboard<br>Challenge<br>Teams<br>Rewards<br>Feedback      | Self-Determination Theory (SDT)                                                                    | Business   | 2015 |
| 194 | Psychological Perspectives on Motivation through Gamification                                        | Trait<br>Achievement<br>Competence<br>Points<br>Badges<br>Leaderboards                           | Self-Determination Theory (SDT)                                                                    | Psychology | 2013 |

|     | Name                                                                                                | Game Element                                                                | Behaviour change Theory                         | Discipline    | Year |
|-----|-----------------------------------------------------------------------------------------------------|-----------------------------------------------------------------------------|-------------------------------------------------|---------------|------|
|     |                                                                                                     | Quests<br>Clear goals                                                       |                                                 |               |      |
| 195 | Understanding Exergame Users' Physical Activity, Motivation and Behavior Over Time                  | Levels<br>Clear Goal<br>Virtual Goods<br>Points                             | social cognitive theory<br>self-efficacy theory | Health        | 2013 |
| 196 | Correlation between videogame mechanics and executive functions through EEG analysis                | Game Genre<br>Elicit action/ decision<br>Feedback                           | N/A                                             | Health        | 2016 |
| 197 | Effects of Reactive and Strategic Game Mechanics in Motion-based Games                              | Reward<br>Challenges<br>Immersion<br>Levels<br>Feedback<br>Strategy         | Self-Determination Theory (SDT)                 | Health        | 2017 |
| 198 | The Interactive Minority Game: a Web-based investigation of human market interactions               | Elicit Action/ Decision<br>Points<br>Interaction                            | N/A                                             | Games         | 2004 |
| 199 | Game Mechanics to Further Engagement with Physical Activity                                         | Challenges<br>Feedback<br>Points                                            | Self-determination Theory                       | Health        | 2018 |
| 200 | Mapping learning and game mechanics for serious games analysis: Mapping learning and game mechanics | Goals<br>Elicit action/ decision<br>Strategies<br>Interactions<br>Avatars   | N/A                                             | Education     | 2015 |
| 201 | Game mechanics' effects on user retention                                                           | Achievements<br>Leaderboards<br>Elicit action/ decision<br>Points<br>Levels | N/A                                             | Entertainment | 2017 |

|     | Name                                                                                                                                             | Game Element                                                                                  | Behaviour change Theory                        | Discipline | Year |
|-----|--------------------------------------------------------------------------------------------------------------------------------------------------|-----------------------------------------------------------------------------------------------|------------------------------------------------|------------|------|
|     |                                                                                                                                                  | Badges                                                                                        |                                                |            |      |
| 202 | Gamification: Using Gaming Mechanics to promote a business                                                                                       | Rewarding<br>Points<br>Achievement<br>Leaderboards                                            | Theory of Flow                                 | Business   | 2014 |
| 203 | Designing productively negative experiences with serious game mechanics: Qualitative analysis of game-play and game design in a randomized trial | role-playing<br>strategy<br>game genre<br>reward<br>Challenges                                | Activity Theory Model of Serious Games (ATMSG) | Psychology | 2018 |
| 204 | Complex behaviour in a production- distribution model                                                                                            | Elicit Action/ Decision<br>Feedback<br>Collaboration<br>Competition                           | N/A                                            | Psychology | 1999 |
| 205 | Exploring Engaging Gamification Mechanics in Massive Online Open Courses                                                                         | Badges<br>Rewards<br>Elicit action/ decision<br>Competition<br>Clear goal<br>Time constraints | N/A                                            | Education  | 2016 |
